# Supplementary material for: Regulation of Active DNA Demethylation by a Methyl-CpG-Binding Domain Protein in Arabidopsis thaliana
Source: PubMed Central journal article supplement (PMC4416881; doi:10.1371/journal.pgen.1005210), 2015-05-01

A

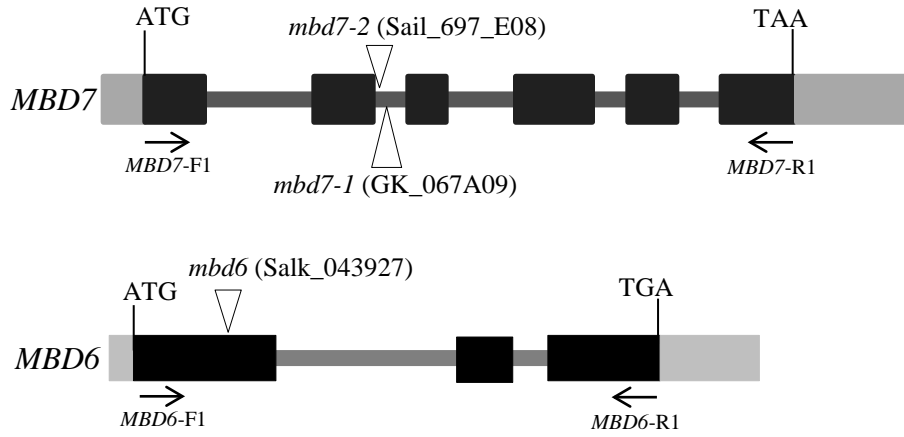

B

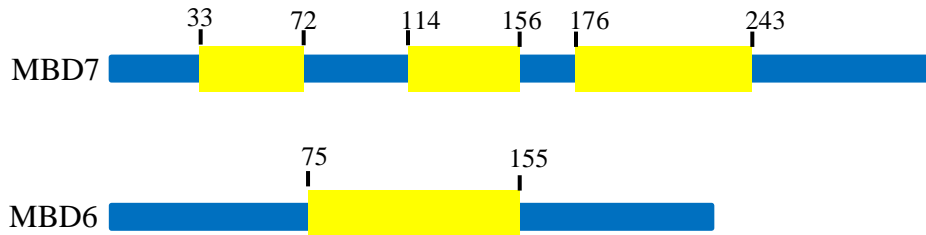

C

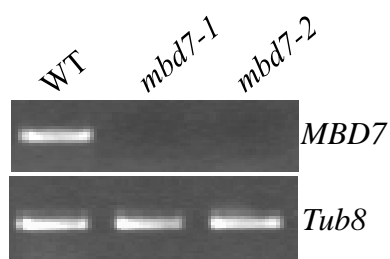

D

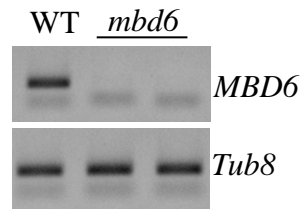

Supplement: pgen.1005210.s003.pdf [file pgen.1005210.s003.pdf]
