# Supplementary material for: Regulation of Active DNA Demethylation by a Methyl-CpG-Binding Domain Protein in Arabidopsis thaliana
Source: PubMed Central journal article supplement (PMC4416881; doi:10.1371/journal.pgen.1005210), 2015-05-01
Supplement: pgen.1005210.s007.pdf [file pgen.1005210.s007.pdf]

A

IDL1 Purification

| Protein Accession | Gene Accession | Protein | Score | Mass   | Spectra | Unique Peptides | % Seq. Cov | % of IDM1 |
|-------------------|----------------|---------|-------|--------|---------|-----------------|------------|-----------|
| IPI00540986       | AT3G14980      | IDM1    | 4599  | 133697 | 236     | 52              | 39         | 100       |
| IPI00545650       | AT1G20870      | IDL1    | 925   | 52470  | 36      | 16              | 39.7       | 81.5      |
| IPI00531355       | AT1G54840      | IDM2    | 531   | 39712  | 42      | 12              | 37.2       | 80.8      |
| IPI00524605       | AT5G59800      | MBD7    | 749   | 35127  | 40      | 12              | 40.8       | 83.7      |
| IPI00536761       | AT5G59380      | MBD6    | 52    | 24435  | 1       | 1               | 5.2        | -         |

IDL1 (IDM2 Like 1) Purification 2#

| Protein Accession | Gene Accession | Protein | Score | Mass  | Spectra | Unique Peptides | % Seq. Cov | % of IDL1 |
|-------------------|----------------|---------|-------|-------|---------|-----------------|------------|-----------|
| IPI00545650       | AT1G20870      | IDL1    | 535   | 52470 | 32      | 13              | 26.8       | 100       |
| IPI00536761       | AT5G59380      | MBD6    | 212   | 24435 | 9       | 6               | 31.1       | 99.1      |

B

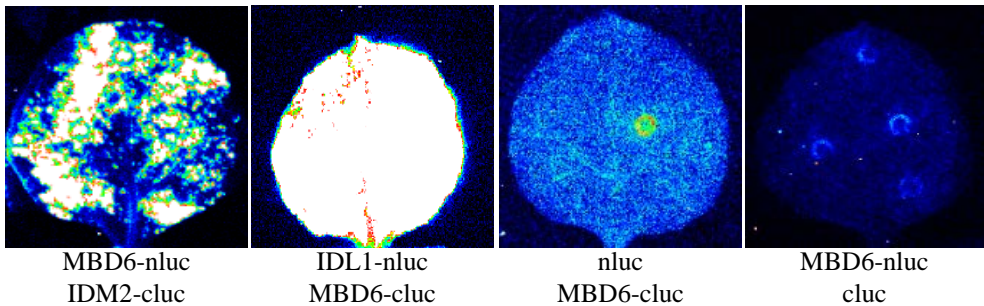

C

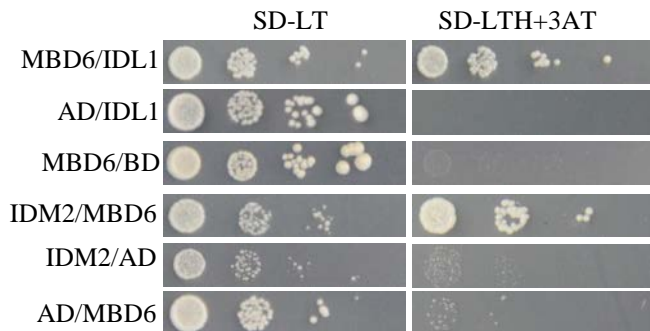

D

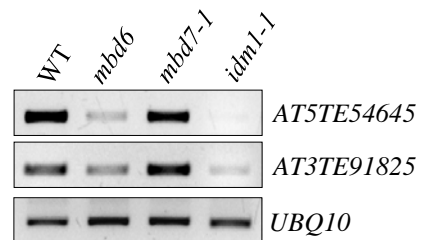

Figure S7
